# Supplementary material for: Improving RNAi in the Brown Marmorated Stink Bug: Identification of target genes and reference genes for RT-qPCR
Source: PubMed Central journal article supplement (PMC5829169; doi:10.1038/s41598-018-22035-z), 2018-02-27
Supplement: 41598_2018_22035_MOESM1_ESM.pdf [file 41598_2018_22035_MOESM1_ESM.pdf]

**Improving RNAi in the Brown Marmorated Stink Bug: Identification of target genes  
and reference genes for RT-qPCR**

**Kanakachari Mogilicherla, Jeffrey L. Howell and Subba Reddy Palli\***

**Department of Entomology, University of Kentucky, Lexington, Kentucky 40546, USA**

Email: (K.M.) [kmo246@g.uky.edu](mailto:kmo246@g.uky.edu); (J.H.) [Jeff.Howell@uky.edu](mailto:Jeff.Howell@uky.edu); \*Correspondence  
addressed to (S.R.P.): [rpalli@email.uky.edu](mailto:rpalli@email.uky.edu)

**Supplementary Information:**

**Figure S1.** Melting curve analysis of qPCR amplification of six housekeeping genes (*18S rRNA*, *Ubiquitin*, *60S RP*, *Actin*,  $\beta$ -*Tubulin* and *EF1 $\alpha$* ) using gene-specific primers

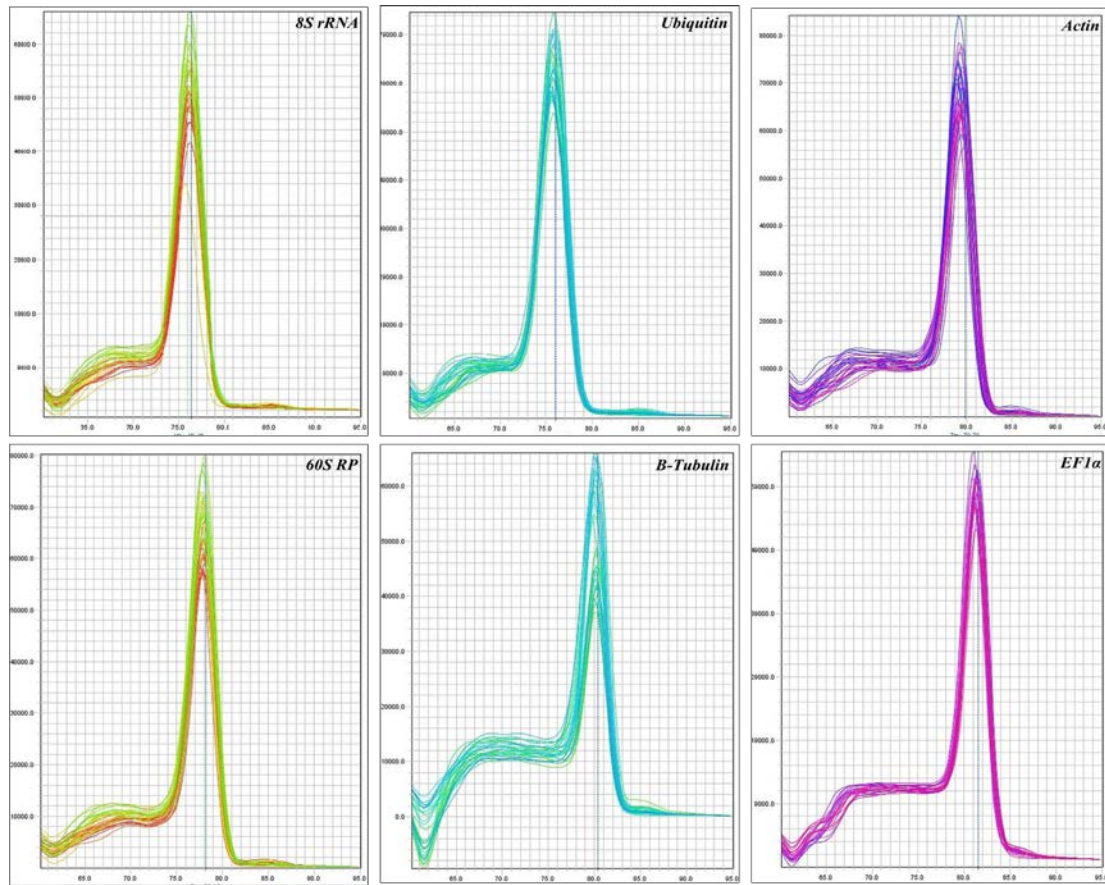

**Figure S2.** Setup for Stink bug nymph's feeding assay. Certified organic green beans were inserted in 2 ml Eppendorf tubes containing 300  $\mu$ l of nuclease free water with 20  $\mu$ g of dsRNA (20  $\mu$ g each day for 3 days), fixed to a solid support and placed in magenta jars. 20  $\mu$ g of five different target genes (*IAP*, *SNF7*, *ATPase*, *PPI* and *GPCR*) dsRNA was fed to 2nd instar BMSB nymphs (15 nymphs per group), whereas, the dsGFP was used as a control.

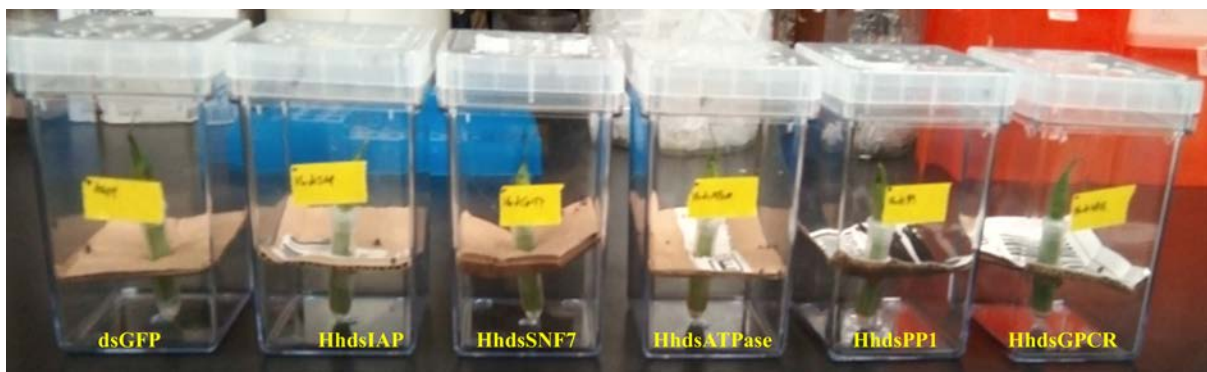

**Figure S3:** Expression stability analysis of each candidate reference gene in different dsRNA treated samples using the geNorm tool. Gene expression stability graph based on average expression stability values (M-value), using stepwise exclusion process. A lower M-value

indicates, higher gene stability. The direction of the arrow indicates the most and least stable housekeeping genes. (A) dsRNA injected adult samples; (B) dsRNA fed nymph samples.

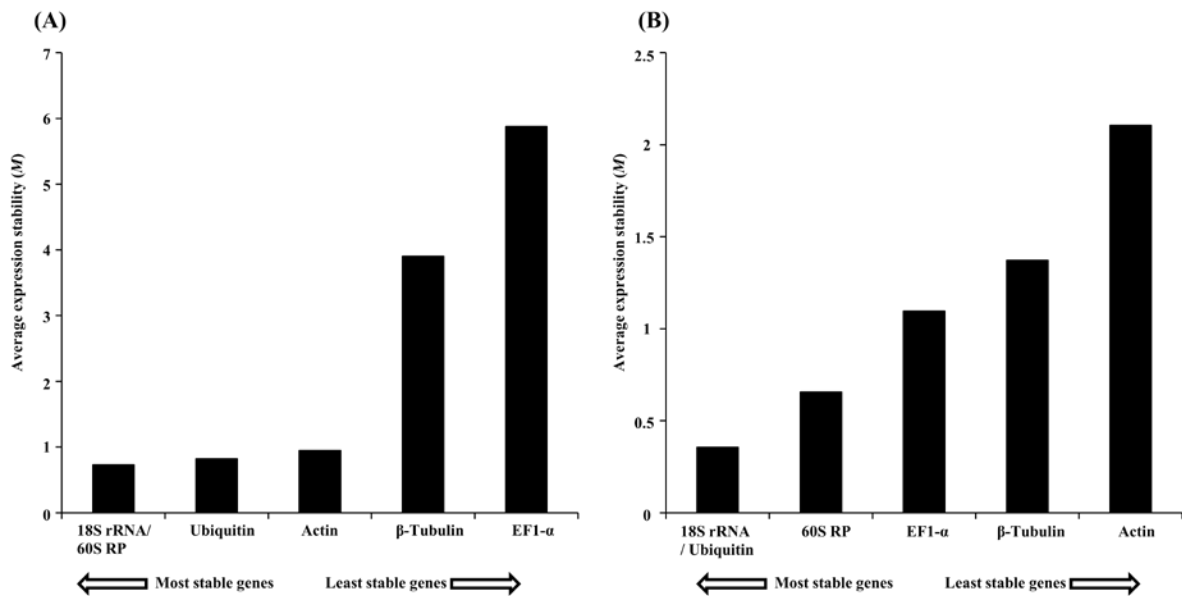

**Figure S4:** NormFinder analysis of the datasets estimated the stability value of all tested genes based on intra and inter-group variation. The genes with lower stability values were considered to be the most stable, whereas with highest stability values were ranked as the least stable genes. (A) dsRNA injected adult samples; (B) dsRNA fed nymph samples.

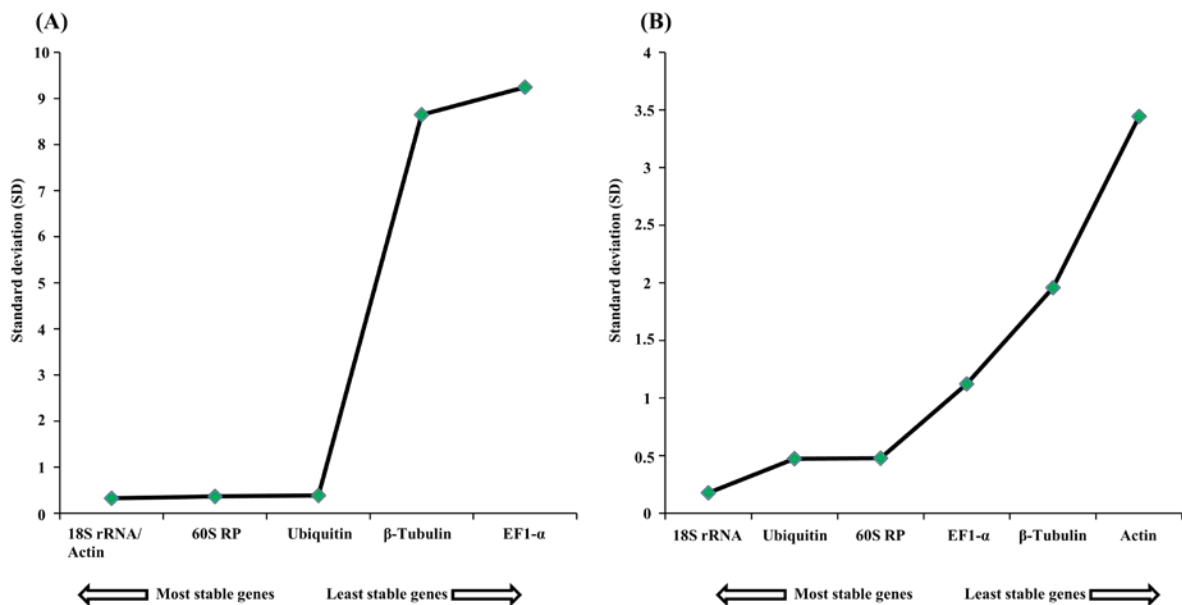

**Table S1.** List of primers used for dsRNA synthesis

| Gene name                                                             | Accession No.<br>( <i>Halyomorpha halys</i> ) | Primer sequence (5'-3')                                                                                | Tm<br>(°C) | Product<br>size (bp) |
|-----------------------------------------------------------------------|-----------------------------------------------|--------------------------------------------------------------------------------------------------------|------------|----------------------|
| Vacuolar-sorting protein (SNF7)                                       | XM_014427464.1                                | F: TAATACGACTCACTATAGGGTCTGAGGAACAAGAGGTTAG<br>R: TAATACGACTCACTATAGGGCTTCAGTTTCGTCGTCCTCTTC           | 60<br>60   | 471                  |
| IAP repeat-containing protein 7-B-like (IAP)                          | XM_014435389.1                                | F: TAATACGACTCACTATAGGGTATGCCCATTTGCCAGAAA<br>R: TAATACGACTCACTATAGGGCTAGAAGCTCCGGACTAACAAATAC         | 60<br>60   | 343                  |
| Actin-5C (Actin)                                                      | XM_014433214.1                                | F: TAA TAC GAC TCA CTA TAG GGTTAAGGGACCGACAAAAGA<br>R: TAA TAC GAC TCA CTA TAG GGCCCAACTCACCGCTAGAATAA | 63<br>64   | 453                  |
| Signal recognition particle 54 kDa protein(SRP)                       | XM_014419857.1                                | TAATACGACTCACTATAGGGATGCGTTGCGTTCGTAAAG<br>TAATACGACTCACTATAGGGTCCACACCATCTTGAGCAATAA                  | 63<br>64   | 497                  |
| Alpha-soluble NSF attachment protein (NSF)                            | XM_014434606.1                                | TAATACGACTCACTATAGGGACACTGACATGGGAAGGTTTAC<br>TAATACGACTCACTATAGGGCCACTGATCCAGTCGTGAAATAG              | 64<br>64   | 494                  |
| Protein ROP (ROP)                                                     | XM_014418690.1                                | TAATACGACTCACTATAGGGGATGCCGAAGGAGAACGTATTA<br>TAATACGACTCACTATAGGGGTTTGTGACCCCTTGTCTTTATG              | 63<br>63   | 464                  |
| G protein-coupled receptor 161-like (GPCR)                            | XM_014438952.1                                | TAATACGACTCACTATAGGGCTCTGCTACTCCGCCATTTAC<br>TAATACGACTCACTATAGGGGGTTCCTGGCTTGAATCTCTT                 | 65<br>62   | 472                  |
| Heat shock 70 kDa protein cognate 3 (HSP70)                           | XM_014425902.1                                | TAATACGACTCACTATAGGGGAGAGGGTTGAAGCTAGGAATG<br>TAATACGACTCACTATAGGGGAGTAAGAGGAAACCGTGAATG               | 63<br>63   | 487                  |
| Serine/threonine-protein phosphatase PP1-beta catalytic subunit (PP1) | XM_014431150.1                                | TAATACGACTCACTATAGGGGCGGCGATATACATGGACAATA<br>TAATACGACTCACTATAGGGGCGGACCACAACAAATCACATAAC             | 63<br>64   | 438                  |
| Putative ATPase N2B (ATPase)                                          | XM_014420983.1                                | TAATACGACTCACTATAGGGTGGGTGGATTGCTTGTATT<br>TAATACGACTCACTATAGGGTCCCTTGGGTGAGTTGATG                     | 61<br>64   | 454                  |
| 26S protease regulatory subunit 6B (26S)                              | XM_014421516.1                                | TAATACGACTCACTATAGGGCTAGAGGCGTGCTAATGTATG<br>TAATACGACTCACTATAGGGCATCTTGGCCGTGATAGTAGAG                | 64<br>64   | 462                  |
| Dynammin                                                              | XM_014433358.1                                | TAATACGACTCACTATAGGGCAGGGATACACTTCCAGGATTAC<br>TAATACGACTCACTATAGGGGACCAGGTCGACACATTTAAGA              | 64<br>63   | 430                  |
| Uncharacterized Kanesin (Kanesin)                                     | XM_014426093.1                                | TAATACGACTCACTATAGGGCTCCACCTCCTCCTCAGATAAA<br>TAATACGACTCACTATAGGGGCTGTCTTACTTTACGGGTCTC               | 65<br>63   | 462                  |

**Table S2.** List of Reference genes evaluated in this study

| Symbol           | Gene name                 | Accession number | Function                                   |
|------------------|---------------------------|------------------|--------------------------------------------|
| 18S rRNA         | 18S ribosomal RNA         | XM_014421522.1   | Constituent of the small ribosomal subunit |
| EF1- $\alpha$    | Elongation factor 1 alpha | XM_014438029.1   | Protein synthesis                          |
| Act              | Actin                     | XM_014431329.1   | Cytoskeletal protein                       |
| Ubi              | Ubiquitin                 | XM_014429239.1   | Protein degradation                        |
| 60S RP           | 60S Ribosomal protein     | XM_014430141.1   | Cellular process of translation            |
| $\beta$ -Tubulin | Beta Tubulin              | XM_014438117.1   | Major constituent of microtubules          |

**Table S3.** List of primers used for qPCR study

| Primer name           | Primer sequence (5'-3')    | Tm (°C) | Product size (bp) |
|-----------------------|----------------------------|---------|-------------------|
| <i>HhActin</i>        | F: GAGTGCATGAGACGACGTATT   | 55      | 112               |
|                       | R: GCGATGCCTGGATACATAGTAG  | 55      |                   |
| <i>HhUbiquitin</i>    | F: GGATTACTGCCATGCTCAATTAC | 54      | 110               |
|                       | R: GACTATCGCACCAGGGTAAAA   | 55      |                   |
| <i>HhBeta Tubulin</i> | F: TTACACAGAAGGTGCAGAGTTAG | 54      | 103               |
|                       | R: CAGGGAATGGGTCATCTGAAA   | 55      |                   |
| <i>Hh18S rRNA</i>     | F: TCGGAGGTCTTGTGTGATTAT   | 54      | 100               |
|                       | R: CCTAAAGCCTGAGGTAATGGTG  | 55      |                   |
| <i>HhEF1 alpha</i>    | F: CCGCTAACATCACCCTGAA     | 55      | 111               |
|                       | R: CCTTGACGGAGACGTTCTTTAC  | 55      |                   |
| <i>Hh60S RP</i>       | F: CCATCAGCAGCTTCTCTTATCA  | 54      | 119               |
|                       | R: CTGGCGATGGTGAGGATTT     | 55      |                   |
| <i>HhATPase</i>       | F: ACCGATATTGCTGATGCTATGA  | 62      | 101               |
|                       | R: AGATCATCAGGTGGACGATTG   | 62      |                   |
| <i>HhPP1</i>          | F: GCCCATCAGGTTGTAGAAGAT   | 62      | 93                |
|                       | R: GTCAAACCTCGCCACAGTAATTG | 62      |                   |
| <i>HhGPCR</i>         | F: TCAGCGACATCTACATCAATCC  | 62      | 113               |
|                       | R: GACGATGAACTACCACCAATCT  | 62      |                   |
| <i>HhIAP</i>          | F: GAAGTTGGTGATGACCCAGATA  | 62      | 106               |
|                       | R: TGCCAGACTGATGTGCTATATT  | 62      |                   |
| <i>HhSNF7</i>         | F: CTTTGATGGCCGAAACTCTTG   | 62      | 100               |
|                       | R: TCCGCACTTTCGATTTGAATTT  | 62      |                   |

**Table S4.** Descriptive statistics of candidate genes using BestKeeper software for dsRNA injected adult samples. **Abbreviations:** **GM:** geometric mean; **AM:** arithmetic mean; **Min** and **Max:** threshold values; **SD:** standard deviation; **CV:** coefficient of variation; **Max** [x-fold] and **Min** [x-fold]: threshold expression levels expressed as absolute x-fold over or under-regulated coefficient; **SD** [ $\pm$  x-fold] standard deviation of absolute regulation coefficient.

| Factor                 | Candidate gene |                  |              |               |                                   |                                |
|------------------------|----------------|------------------|--------------|---------------|-----------------------------------|--------------------------------|
|                        | <i>18SrRNA</i> | <i>Ubiquitin</i> | <i>Actin</i> | <i>60S RP</i> | <i><math>\beta</math>-Tubulin</i> | <i>EF1-<math>\alpha</math></i> |
| <b>GM [CP]</b>         | 22.69          | 22.02            | 25.71        | 18.51         | 23.96                             | 29.81                          |
| <b>AM [CP]</b>         | 22.70          | 22.06            | 25.72        | 18.53         | 25.40                             | 31.87                          |
| <b>Min [CP]</b>        | 21.60          | 20.23            | 24.19        | 17.13         | 14.96                             | 8.20                           |
| <b>Max [CP]</b>        | 23.94          | 27.15            | 27.28        | 22.56         | 39.90                             | 39.90                          |
| <b>SD [+/- CP]</b>     | <b>0.52</b>    | <b>0.99</b>      | <b>0.61</b>  | <b>0.64</b>   | <b>8.01</b>                       | <b>6.15</b>                    |
| <b>CV [% CP]</b>       | 2.27           | 4.50             | 2.37         | 3.47          | 31.54                             | 19.30                          |
| <b>Min [x-fold]</b>    | -2.12          | -3.46            | -2.86        | -2.60         | -510.91                           | -3198712.15                    |
| <b>Max [x-fold]</b>    | 2.38           | 35.00            | 2.97         | 16.59         | 63000.77                          | 1090.63                        |
| <b>SD [+/- x-fold]</b> | 1.43           | 1.99             | 1.52         | 1.56          | 258.20                            | 71.03                          |

**Table S5.** Descriptive statistics of candidate genes using BestKeeper software for dsRNA fed nymph samples. **Abbreviations:** **GM:** geometric mean; **AM:** arithmetic mean; **Min** and **Max:** threshold values; **SD:** standard deviation; **CV:** coefficient of variation; **Max [x-fold]** and **Min [x-fold]:** threshold expression levels expressed as absolute x-fold over or under-regulated coefficient; **SD [ $\pm$  x-fold]** standard deviation of absolute regulation coefficient.

| Factor          | Candidate gene |                  |              |               |                                   |                                |
|-----------------|----------------|------------------|--------------|---------------|-----------------------------------|--------------------------------|
|                 | <i>18SrRNA</i> | <i>Ubiquitin</i> | <i>Actin</i> | <i>60S RP</i> | <i><math>\beta</math>-Tubulin</i> | <i>EF1-<math>\alpha</math></i> |
| GM [CP]         | 20.92          | 17.76            | 24.12        | 15.76         | 30.29                             | 29.63                          |
| AM [CP]         | 20.93          | 17.76            | 24.33        | 15.78         | 30.34                             | 29.66                          |
| Min [CP]        | 19.77          | 16.92            | 18.39        | 13.47         | 27.06                             | 27.35                          |
| Max [CP]        | 22.32          | 19.33            | 28.14        | 16.72         | 34.44                             | 32.98                          |
| SD [+/- CP]     | <b>0.51</b>    | <b>0.43</b>      | <b>2.52</b>  | <b>0.52</b>   | <b>1.36</b>                       | <b>1.14</b>                    |
| CV [% CP]       | 2.42           | 2.41             | 10.36        | 3.3           | 4.49                              | 3.84                           |
| Min [x-fold]    | -2.22          | -1.78            | -53.11       | -4.9          | -9.38                             | -4.86                          |
| Max [x-fold]    | 2.64           | 2.98             | 16.21        | 1.94          | 17.75                             | 10.2                           |
| SD [+/- x-fold] | 1.42           | 1.34             | 5.74         | 1.43          | 2.57                              | 2.2                            |

The sequence information and their accession numbers of *Halyomorpha halys* candidate genes used for dsRNA synthesis:

> **HhIAP (Baculoviral IAP repeat-containing protein 7-B-like; Accession no: XM\_014435389.1)**

5'-

TATGCCCATTTGGCCAGAAAATGCCCTGTTGATGCTAGGAGAATTGCTGCTGCTG  
GCTTTTATTACATGGGTCAAGGATTGGAAGTGCAATGTTTCAGTTGTGGTGGAAAG  
AATATCGGAATGGAATATAGGTGACAGTGTCATGTCTAAACACAGAGTACTAGA  
CCATTTTGTCCCTTTGTGCAAAACCCTATTTTGTCTGGTAATATACCACTTATTA  
GTGATCGTAGAAATTCTCCTAATACTAGCCAGGAAAACCAATCAGTTTATCAAAA  
TGAAAATCAAGACTTGATACCTTTACAGCTTGGCCTATTCGCAGTATTGTTAGT  
CCGGAGCTTCTAG-3'

> **HhSNF7 (Charged multivesicular body protein 4b; Accession no: XM\_014427464.1)**

5'-

GGTCTGAGGAACAAGAGGTTAGCCCTTCAAGCTCTCAGGAGGAAGAAGAAGTTC  
GAACAGCAATTGAAGCAGGTGGATGGGACGCTAGCGACTATAGAGCTGCAGAA  
GGATGCTCTCGAAGGAGCGAGGACCAACACGGAGGTATGTGAGACCCTCAAGTT  
GGCATCGGACGCCATGAAAGCGACGCAGAAGAACATAGACATAGACAAGTTGC  
ACGACATATTGGACGACCTCAGCGAACAGCAGGAAATCGCCCAAGAGATTGCCG  
ATGTCGTCTCTAGACCGATCAACATAGGTGGGGATGTTGACGACGATGAGTTAG  
AACGTGAGCTGGAAGAGCTGGAGCAGGAAGAAGTGGACAAAGAGATGATGGCC  
ATTGGCGTCACGTCGGAGGATCTACCGGCAGTCCCTTCGGCTGCAGTGGCCGGAC  
CAGCGACTTCTTCAACCAAGAAGAGGACGACGAACTGAAG-3'

> **HhActin (Actin-5C; Accession no: XM\_014433214.1)**

5'-

GGTTAAGGGACCGACAAAGATTTTCGTTGCCTCATAAACTATTAAGTATTTTTTA

TAATTGCATAGCATCTGCGAAGAAACATCTGGTTTTAAACAAAGAATAGTTTGGC  
ATTCTTTTGGTAGCTACTACTGATACAGGATTTAAGATAATTTAAAAATATTTTGA  
CATGTTACGTTTTTAATCGATTTATATTATAATCCACTTAATCAAAATCTAAATTT  
AGCATTTACCTATTAATGGTTGATGATTTTTCACTTGTTACTATTAAGGAATTTT  
TTCTATCAAATGCTGCTTGTACATGAATACAAAATTTATGGTTGAGTGTTTACAA  
AATTGTTAGTTTATAATTACCAGTAGTTATATAAAGATAATTTAATTGTTGTCGC  
CAAAATTTCTCTTGATCACTGAAACCTCTAATCTGATGATATATTATTCTAGCGGT  
GAGTTGGGC-3'

> **HhSRP (Signal recognition particle 54 kDa protein; Accession no: XM\_014419857.1)**

5'-

GATGCGTTGCGTTCGTTAAGTAATGCTACAATTATAAATGAAGAAGTTTTGGCTT  
CTATGCTGAAAGAAGTATGTGCTGCATTATTGGAAGCTGATGTAAATATTCGTCT  
TGTGAAAAAGTTACGTGAAAATGTCAGAGCTGTTATTGATTTTCGATGAGATGGCT  
GGTGGACTTAACAAGCGGCGAATGATACAAAGTGCTGTTTTTAAAGAATTAGTG  
AAACTTGTTGATCCTGGTGTGAAGGCATTTCAACCTACTAAAGGAAAGCCAAAT  
GTTATCATGTTTGTGGTCTTCAAGGTTTCAGGAAAAACAACACTTGTACTAAAT  
TAGCTTATCACTATTTAAAAAAAATTGGAAAGCCTGTCTGGTATGTGCTGATAC  
ATTCCGTGCTGGTGCCTACGATCAGTTAAAGCAGAATGCTACCAAGGCGAGGAT  
TCCATTTTATGGAAGTTACACAGAAATTGACCCGGTTGTTATTGCTCAAGATGGT  
GTGGA-3'

> **HhNSF (Alpha-soluble NSF attachment protein; Accession no: XM\_014434606.1)**

5'-

ACACTGACATGGGAAGGTTTACAATGGCTGCAAAACATCATCAAACCTATTGCTG  
AAATGTATGAAACTGAAGCAGTTGATCTTGAAAGAGCTGTTCAACATTATGAGC  
AAGCGGCTGATTTTTTTAGAGGAGAAGAAAGTAATTCTGCTGCAATAAGTGTAT  
GCTAAAAGTTGCTCAGTATGCTGCACAGTTAGAAAACCTATGACAAAGCTATTCA  
AATTTATGAGCAGGTCGCCTCTTCTTCTTAGACAGTTCACTACTCAAGTACAGT  
GCTAAAGAATATTTCTTCAGAGCTGCTTTATGTCATTTGTGTGTTGATGTACTTAA  
TGCCCAGCAAGCTATGGAGCGATACATAGATCTTTACCCAACCTTCCAAGATTCC  
AGAGAATATAAACTTTTGAAGGTTCTAATTGATCACATAGAGGAACAAAATGCT  
GATGGCTTTACGGAAGCAGTCAAAGATTATGATTCTATTTACGACTGGATCAGT  
GG-3'

> **HhROP (Protein ROP; Accession no: XM\_014418690.1)**

5'-

GATGCCGAAGGAGAACGTATTAAGGACCACATGAGAAATATTGTTCTATACTC  
CTCGACCAATCTGTCTCTAATTATGACAAGATGAGAATCATCCTCCTGTATACCC  
TGTCCAAGAATGGTATTTCCGAAGAGAACTTGAACAACTTGTCCAACACGCTCA  
GATCCAGCCACATGAGAAACAGGCCATTGTCAATCTAGGAAATCTTGGCCTAAA  
TGTTGTTGTTGATGGTACTCGTATCAAAAAGCCATATGTGCCTCCTCGTAAGGAG  
CGTATTACTGAGCAAACATACCAGATGTCTCGTTGGACACCTGTGATCAAGGATC  
TCATGGAGGATTGCATAGATGACAAGCTCGACCTGAAACATTTCCCCTTCTGGC  
TGGTAGGGCTGCGTCCTCAGGATATCATGCTCCCGCCAGCGTGCGATATGGACAC  
TGGCATAAAGACAAGGGTCAGCAAAC-3'

> **HhGPCR (G protein-coupled receptor 161-like; Accession no: XM\_014438952.1)**

5'-

CTCTGCTACTCCGCCATTTACACCGCCCTCACTCTACTCCTTCCGATAGCTGTCAT

CATGGCCTGTAACCTCAAGGTGCTGATGATTGCCCGATACCATAGACACAGGATC  
GCTCGGGCCATCTTCGAGGTAACCCTATCAGCCCAAGTGACTATCACCCACCAGA  
AGAATCCATTTGTTGTCTCTAGCGGATCAGGTCGTGGGAGGAGCCCTACAGCTAC  
GGTACTTCAGCTGGTTGGCTCAGTCATCATACTGTACTCGCCCTACTACTGCATC  
ATTCTGTGGCAGGGCTTAGGCAGGAAGCCTTCACCAGGGTACTTGAATTGCGT  
CTAGTCTACTTGCTTGTGCACCAACACTCAACGGCCTTTTGTATGGCCTAAAGAA  
CAAACCTCCTTAGGCGAGCATTAGACATTATTGGAGAAAGAAAATGACAAAGAA  
TGAACCTGAACAAGAGATTCAAGCCAGAACCC-3'

> **HhHSP70 (Heat shock 70 kDa protein cognate 3; Accession no: XM\_014425902.1)**

5'-

GAGAGGGTTGAAGCTAGGAATGAACTTGAATCGTATGCTTATTCTCTAAAGAATC  
AGCTTTCTGACAAAGACAAACTTGGAGCAAAGGTCTCCGATGATGACAAGACTA  
AGATGGAAGCAGCTATTGATGAAAAGATCAAGTGGTTAGAAGAAAACCAAGATG  
CTGATAGTGAATCCTTCCAGCAACAGAAAAAAGAGCTTGAAGAAGTAGTTAAGC  
CCATCATCACGAACTTTACCAAGGTGGAGCACCTCCCCCAGGAGGAGCTGAAG  
AAGATGTTAAGGATGAACTATAAGACTGCTTTAGCTTCATAATTCATTTTGT  
ACAAGACTTAAATTATTGAGAAAACAGCAGTATTTATATTTCTATATTTGAAGT  
AATTACTGCAATGTTGTTACTCTGTATAAAACCCAGTTAGAGGAAATTCCTATTT  
ATTGAAATAATAATTAATAAAAAAAAAAATCCATTCACGGTTTCCTCTTACT-3'

> **HhPP1 (Serine/threonine-protein phosphatase PP1-beta catalytic subunit; Accession no: XM\_014431150.1)**

5-

GCGGCGATATACATGGACAATATACAGATCTCCTTAGGTTATTTGAATACGGTGG  
TTTTCCGCCTGAAGCAAATTATCTGTTTTTGGGTGATTATGTCGATCGTGGAAAAC  
AGTCTCTTGAAACCATTTGCCTTCTACTTGCATATAAAATCAAATATCCAGAAAA  
TTTCTTTCTTCTTCGAGGAAACCACGAATGTGCATCAATCAACAGAATATATGGA  
TTTTATGATGAATGTAAAAGGAGGTATAACATAAAGTTATGGAAAACATTCACTG  
ATTGTTTCAACTGTCTTCCAATCGCTGCCATTATTGATGAAAAAATATTTTGTTC  
CATGGAGGTTTAAAGTCCAGATTTGCAAGGAATGGAACAAATTAGACGAATAATG  
CGACCTACTGATGTTCCGGACACGGGTCTGTTATGTGATTTGTTGTGGTCCG-3'

> **HhATPase (Putative ATPase N2B; Accession no: XM\_014420983.1)**

5'-

TGGGTGGATTGCCTGTTATTCTTGTGAGATGGTTCTTAAATTATATAAACTTCTT  
TTATTTCAGTTTTTAATATGTGATATTTTCCTTGTTTAATGACAAAATAACAATTG  
CCCTAAGATCTATTATGTTACCATTAACTTATTTAATATTTTCTACAAATCAAAG  
TTCCTTAAAGTTTCTACTAGTCCCAGCTTTTATCATTGTTTAAAGAAAAATTTT  
AGTTCAAGTATTGAAGCATCTAAACAGTGCTGTTCAACCCTCACTGAGTCCAATC  
CAAGCTCTTGAAACATTGATAACAAAAGGTGAATTAAGAGAAGATCCCCATCAA  
AAAATTATTGTTCAAGAACTTGAGAAGGTTTATTTAGATATCCAGAACTATTCCC  
CAGCTAAAGTAGGATTTTTTGTCTAAATTATTCCATCAAAGCAATGCCATCAACTC  
ACCCAAGGGAA-3'

> **Hh26S (26S protease regulatory subunit 6B; Accession no: XM\_014421516.1)**

5-

CCTAGAGGCGTGCTAATGTATGGGCCACCAGGCTGCGGCAAACAATGCTTGCT  
AAAGCCGTTGCCATCATACCACTGCGGCGTTCATCCGAGTAGTTGGATCTGAAT  
TCGTTCAAAAATATCTTGGAGAAGGACCTAGAATGGTTCGTGACGTTTTCAGACT



CGCTAAAGAAAACGCTCCTGCCATCATCTTCATCGACGAAATTGATGCCATTGCT  
ACAAAAAGGTTTGGATGCTCAGACTGGTGCTGACAGAGAAGTGCAGAGGATTCTA  
TTGGAAGTCTCAACCAGATGGATGGTTTTGACCAAACCACGAATGTAAAGGTT  
ATAATGGCTACAAACAGAGCAGATACCTTGGACCCTGCCCTGCTAAGGCCCGGT  
AGGCTGGACAGGAAGATAGAATTCCTCCTGACAGGCGGCAGAAGAGGCTC  
GTCTTCTCTACTATCACGGCCAAGATG-3'

> **HhDynamin (Dynamin; Accession no: XM\_014433358.1)**

5'-

CAGGGATACACTTCCAGGATTACGAGATAAACTCCAGAAACAAATGCTTGCCTT  
AGAAAAAGATGTTGAACAGTACAAATACTTCAGACCTGATGACCCTTCTATCAA  
AACCAAAGCAATGCTGCAGATGATACAACAGTTACAGTCGGATTTTGAAAGAAC  
CATTGAAGGGAGTGGTTCAGCCCAAATCAACACTGTGGAGCTGTCTGGTGGTGTCT  
AAGATTAACCGGCTCTTTCATGAGAGGTTTCCTTTTGAAGTGGTCAAATGGAAT  
TCGATGAAAAGGAACTCCGAAGGGAAATTGCTTTTGCTATCAGAAATATTCATGG  
TATAAGAGTTGGCTTATTTACACCTGATATGGCCTTTGAAGCAATAGTCAAAAAG  
CAGATTGAAAGGCTCAAAGAACCATGTCTTAAATGTGTTCGACCTGGTC-3'

> **HhKanesin (Uncharacterized Kanesin; Accession no: XM\_014426093.1)**

5'-

CTCCACCTCCTCCTCAGATAAATGGATTTGAACCCTCAGTGGCACCTCCTGGTTTC  
ATTAAACAAAATCTTCCTGGTGAAATTCAACAAGGATTAATCAGACCTGTACTTC  
CTGTCACTTACTTTAACCCAGATTACCAATTATACAATGGCACACCAGGTGTTGA  
ACCATCAGTTGATGTTTTAACAAGTCTCATGACACCACCAACAGCTCCTAATTC  
TCTCAGGTGCCTACTCAAATTATGTTGTTGAACCATCTCAAGAAAACACTGCTG  
CATCTGCTACACCAGCAGCTATCACAGCTTCAACTCCTGATATAAATGTTAGTGA  
ATTGTATAAAAAACTAGTAGCTATTGGAGTAGTGCCTCCATTAAGAAAAAGA  
AAAGGAGAATACTGAAAATAGGTTAGCTGTAAACCAGTTGATTTTTCGAAGCCT  
GAGACCCTGAAAGTAAGACAGC-3'
